# Supplementary material for: The future Alert of Inter-arm blood pressure difference Among young healthy population: A Cross-sectional Study
Source: Research Square preprint supplement (doi:10.21203/rs.3.rs-1208309/v2), 2022-02-14
Supplement: Supplementary file 1 [file 25d25f782e68a062e1556a4c.docx]

**Table S4:** Inter Arm Systolic Difference, according to (BMI).

| Inter-arm difference | | | |
| --- | --- | --- | --- |
| Clinical variables | 5- 10 mm Hg N (%) | >10 mm Hg N (%) | *P* value |
| Classification of BMI |  |  | .046 |
| Underweight BMI (< 18.5)  (n=440) | 41 (52) | 38 (48) |  |
| Normal weight BMI (18.5 – 24.99)  (n=1904) | 234 (58) | 169 (41.9) |  |
| Overweight BMI (25 – 29.99)  (n=558) | 123 (68.3) | 57 (31) |  |
| Obesity BMI (≥30)  (n=124) | 18 (60) | 12 (40) |  |

Data are expressed as frequency and percentage, or numbers (%). The *P* value was derived from, chi square test. BMI=body mass index
